# Supplementary material for: Cynarin alleviates acetaminophen-induced acute liver injury through the activation of Keap1/Nrf2-mediated lipid peroxidation defense via the AMPK/SIRT3 signaling pathway
Source: Royal Society of Chemistry journal article supplement (doi:10.1039/d3fo05025d), 2024-01-01

Figure 1D

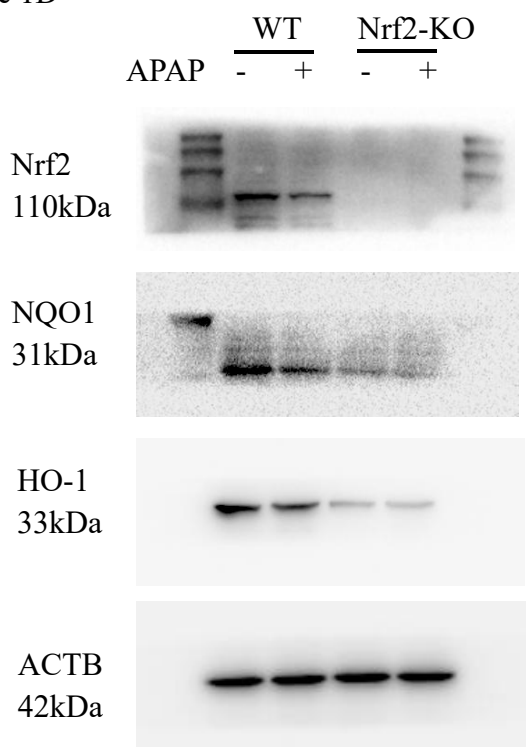

Figure 2G

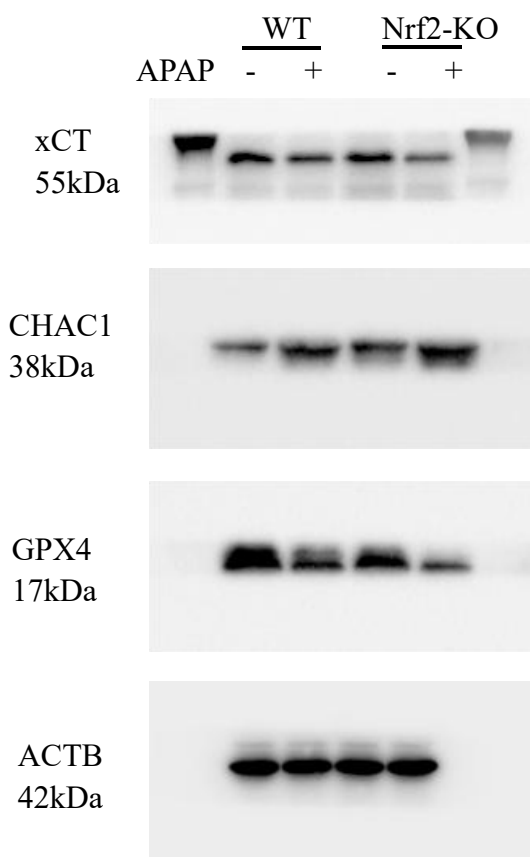

Figure 4H

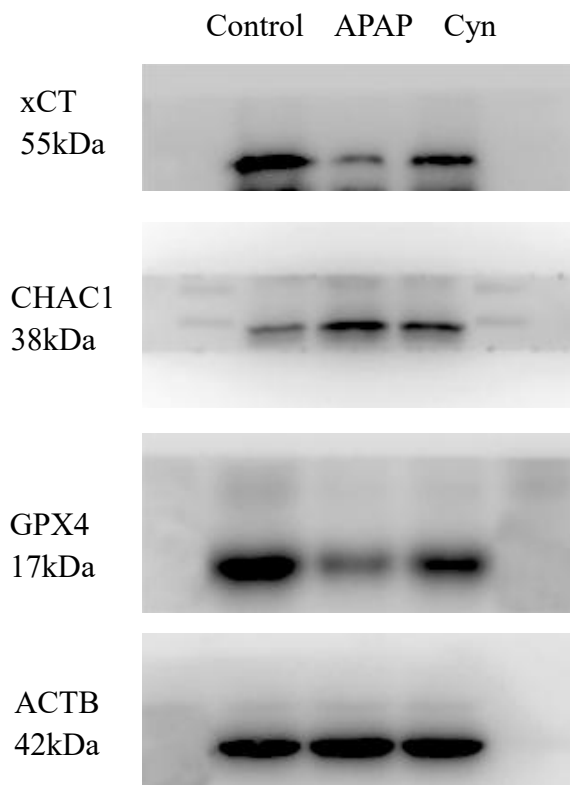

Figure 4J

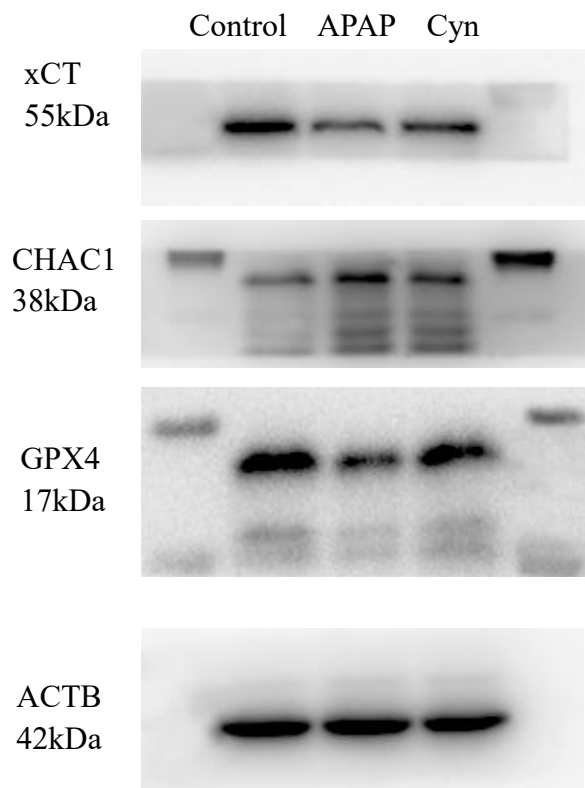

Figure 5D

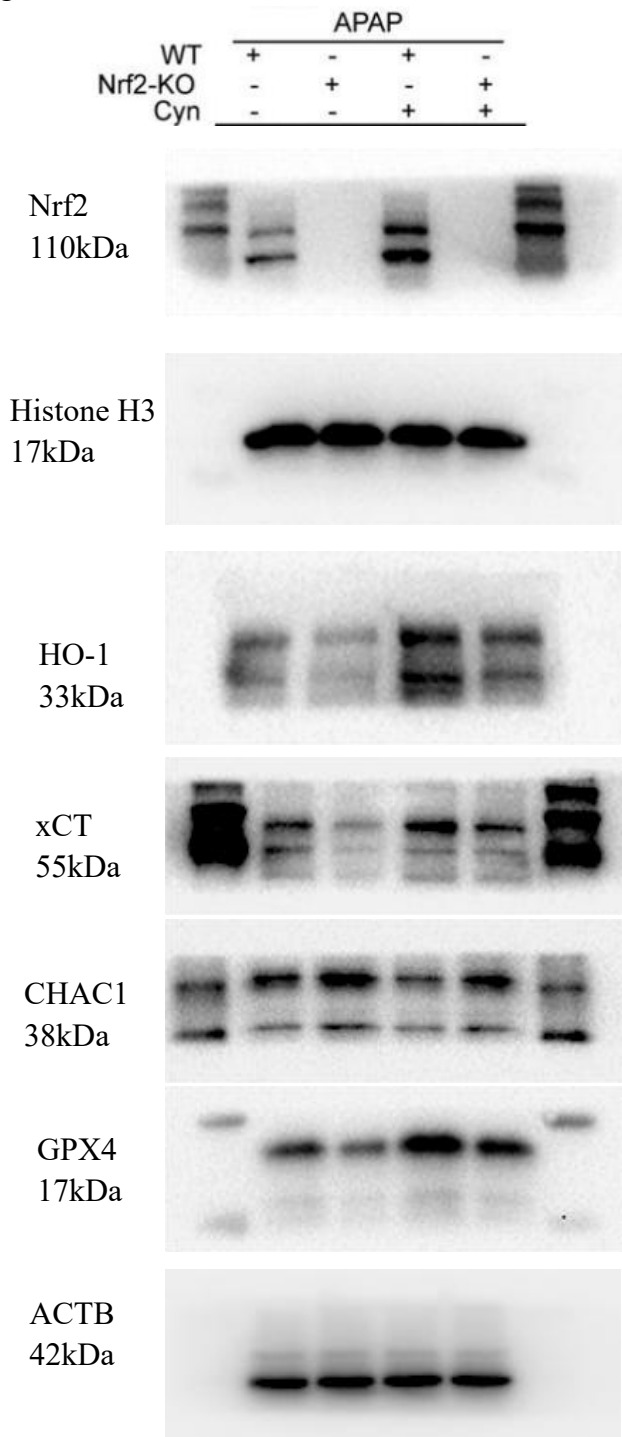

Figure 5H

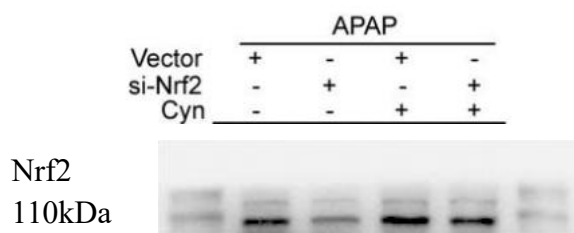

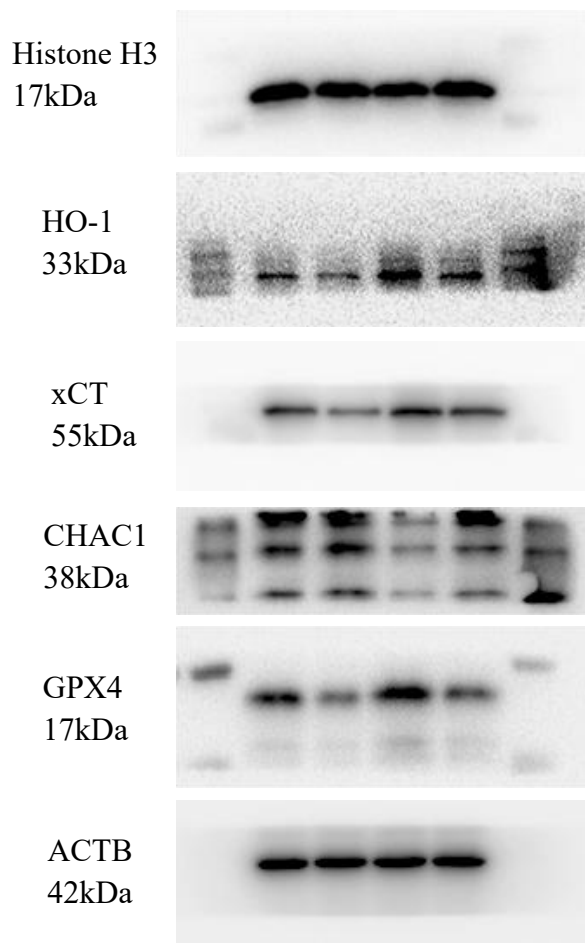

Figure 6D

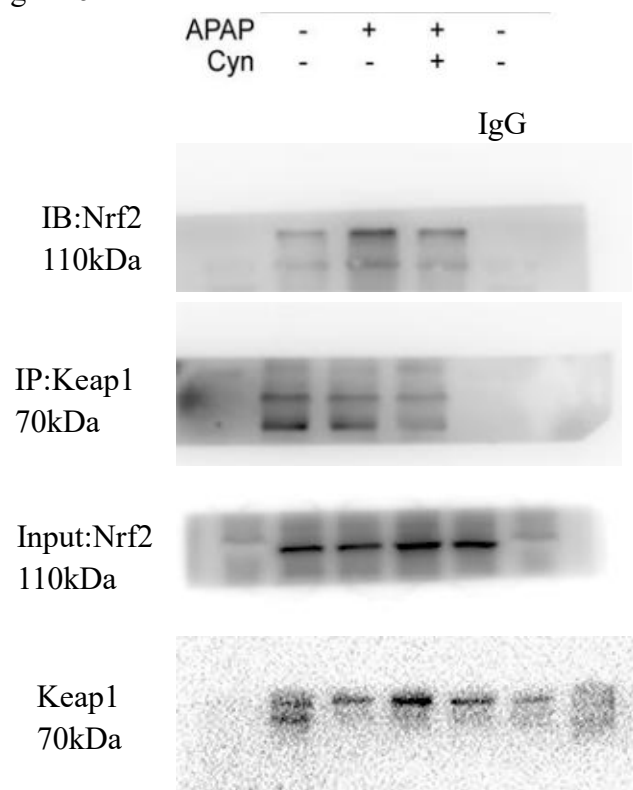

ACTB  
42kDa

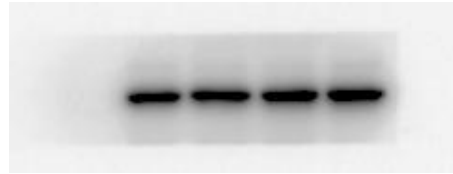

Figure 6F

|          |   |   |   |   |
|----------|---|---|---|---|
| Vector   | + | - | + | - |
| Keap1-OE | - | + | - | + |
| Cyn      | - | - | + | + |
| APAP     |   |   |   |   |

Nrf2  
110kDa

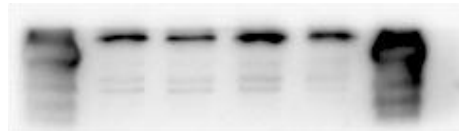

Histone H3  
17kDa

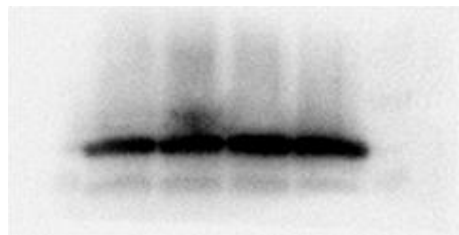

Keap1  
70kDa

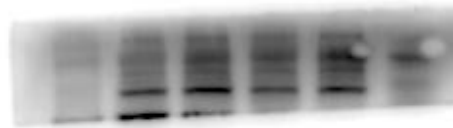

HO-1  
33kDa

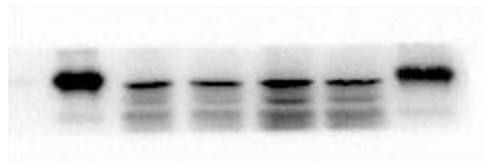

ACTB  
42kDa

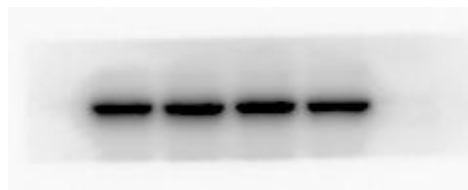

Figure 6H

|          |   |   |   |   |
|----------|---|---|---|---|
| Vector   | + | - | + | - |
| Keap1-OE | - | + | - | + |
| Cyn      | - | - | + | + |
| APAP     |   |   |   |   |

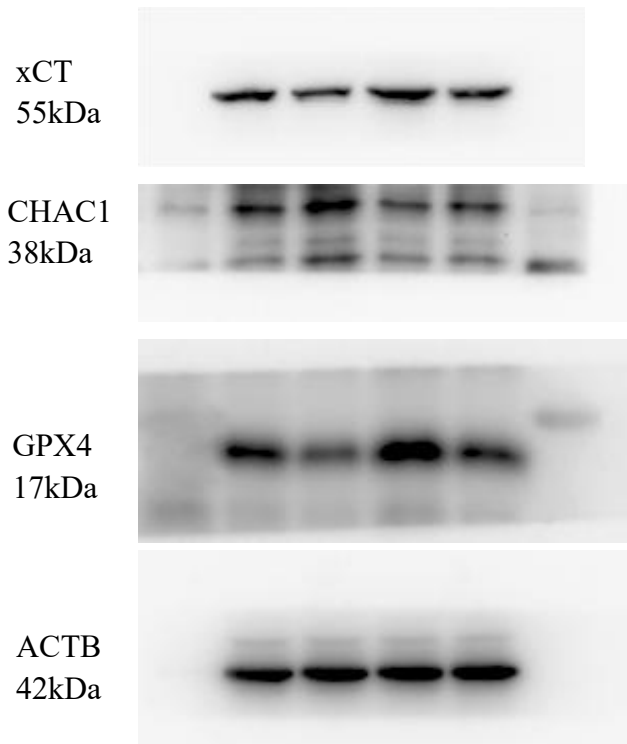

Figure 7A

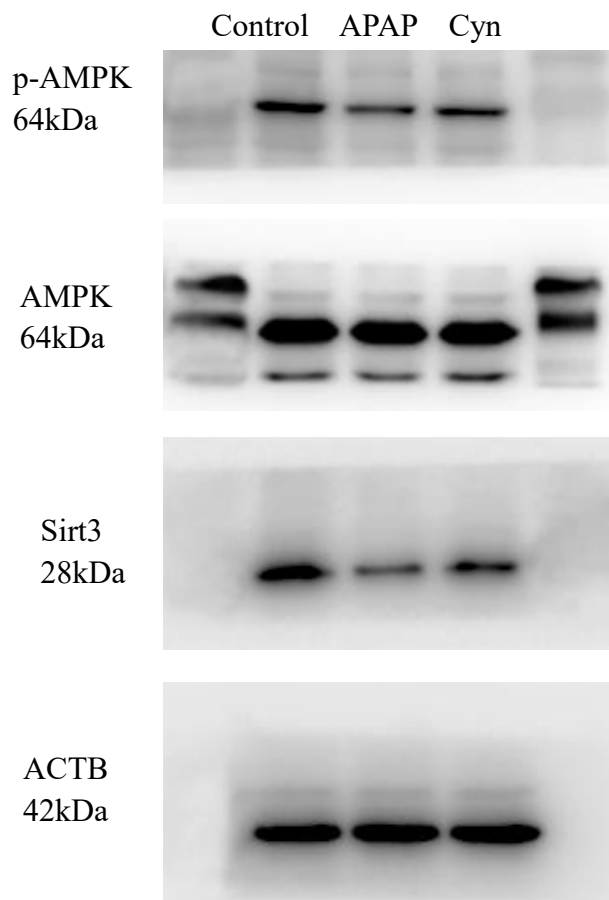

Figure 7C

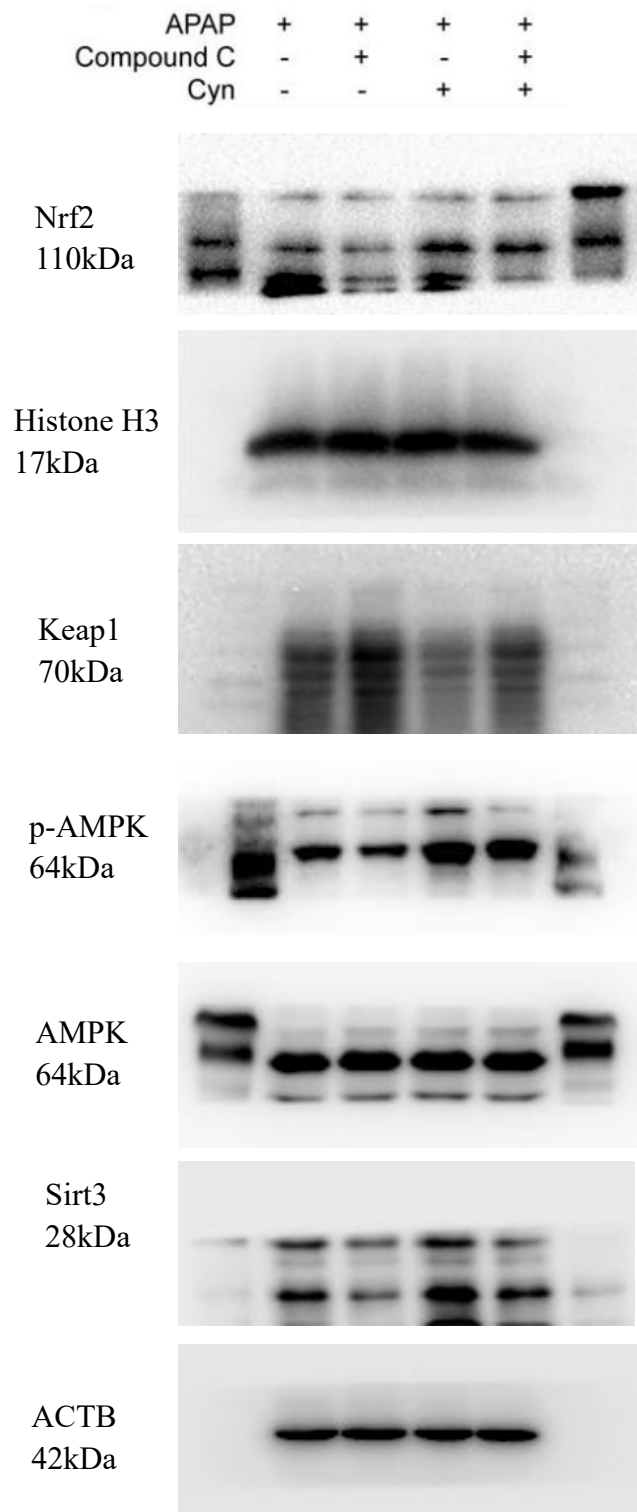

Figure 7D

|       |   |   |   |   |
|-------|---|---|---|---|
| APAP  | + | + | + | + |
| 3-TYP | - | + | - | + |
| Cyn   | - | - | + | + |

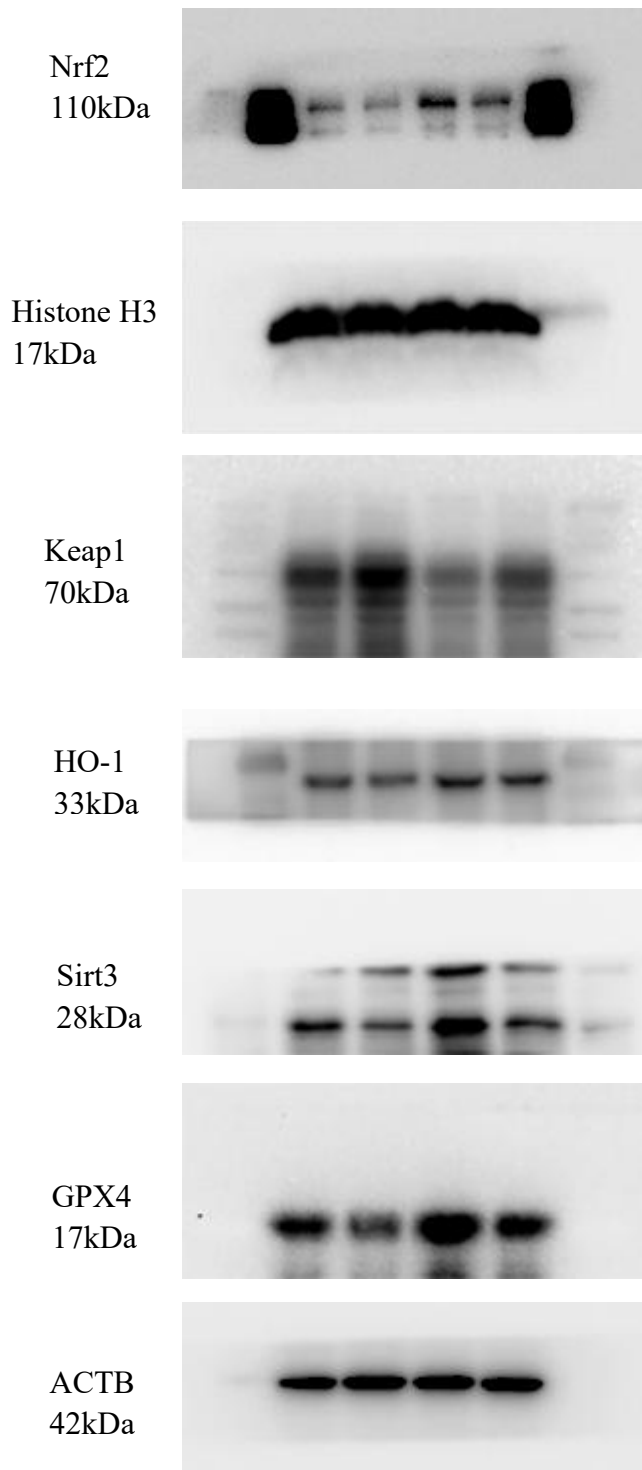

Figure S1A

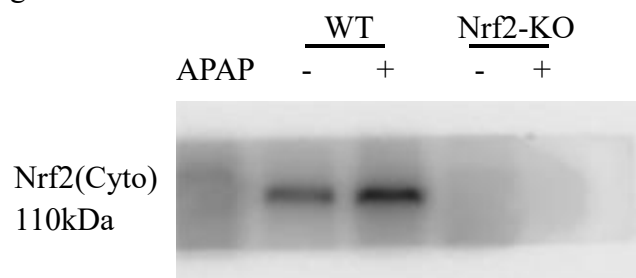



ACTB  
42kDa

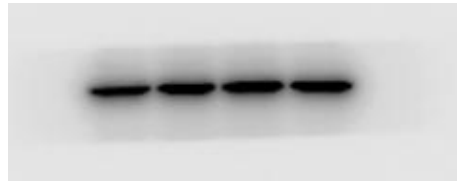

Nrf2(Nucl)  
110kDa

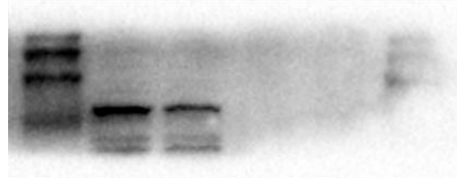

Histone H3  
17kDa

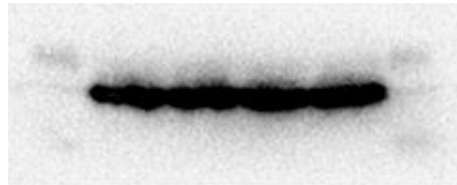

Supplement: d3fo05025d1.pdf [file d3fo05025d1.pdf]
